# Supplementary material
Source: HighWire-hosted journal article supplement (https://rapm.bmj.com/highwire/filestream/12024/field_highwire_adjunct_files/1/rapm-2019-100996supp002_data_supplement.pdf)
Supplement: rapm-2019-100996supp002_data_supplement.pdf [file rapm-2019-100996supp002_data_supplement.pdf]

## Supplementary File. Characteristics of included studies.

| Author                           | Experimental design         | Number of subjects                                  | Mean age (SD)                                                                    | Sex (% female)                                                        | Indication for SCS placement                                                                 | Current smokers                                                | Former smokers | Bias risk summary |
|----------------------------------|-----------------------------|-----------------------------------------------------|----------------------------------------------------------------------------------|-----------------------------------------------------------------------|----------------------------------------------------------------------------------------------|----------------------------------------------------------------|----------------|-------------------|
| Amann <sup>7</sup><br>2003       | Prospective cohort study    | Total=112; SCS match=41; SCS no match=32; no SCS=39 | 68.0 (13.0), demographics only reported for SCS-match (n=41)                     | 34.1%; demographics only reported for SCS-match (n=41)                | Critical limb ischemia                                                                       | 63.4% smokers; demographics only reported for SCS-match (n=41) | --             | High              |
| Biurrun <sup>8</sup><br>2015     | Prospective cohort study    | 17                                                  | 55.6 (8.8)                                                                       | 47.0%                                                                 | CLBP due to back surgery (88%) or trauma (12%)                                               | 41.0%                                                          | --             | Moderate          |
| Collison <sup>9</sup><br>2017    | Prospective cohort study    | 24                                                  | 49.5                                                                             | 62.5%                                                                 | Not detailed, 4 cervical placement; 20 thoracic or thoracolumbar placement                   | 33.3%                                                          | --             | Moderate          |
| De La Cruz <sup>10</sup><br>2015 | Retrospective cohort study  | 57                                                  | 47.8 in "failure" group; 51.2 in "success" group                                 | 59.6%                                                                 | 60% FBSS; 20% CRPS; 20% "neuritis"                                                           | 35.0%                                                          | --             | Moderate          |
| Deer <sup>11</sup><br>2014       | Prospective cohort study    | 571 total; 407 with 3 month outcomes                | 54.0 (13.6)                                                                      | 57.2%                                                                 | 47% FBSS; 20% radiculopathy; 9% CRPS; 5% degenerative disc disease; 6% chronic pain syndrome | 27.5%                                                          | --             | Moderate          |
| Donas <sup>12</sup><br>2005      | Retrospective cohort study  | 29                                                  | 33.7 (4.8)                                                                       | 24.1%                                                                 | Buerger's disease                                                                            | 89.7%                                                          | --             | Moderate          |
| Eddicks <sup>13</sup><br>2007    | Randomized controlled trial | 12                                                  | 65.0 (8.0)                                                                       | 33.3%                                                                 | Refractory angina                                                                            | 66.7%                                                          | --             | High              |
| Falowski <sup>14</sup><br>2018   | Retrospective cohort study  | 6615                                                | 51.0 (13.6) infected initial group; 53.9 (12.7) non-infected initial group; 49.8 | 59.9% infected initial group; 60.4% non-infected initial group; 58.8% | 75% CLBP                                                                                     | 14.1%                                                          | --             | Low               |

|                             |                             |                        | (9.9) infected replacement group; 54.3 (13.0) non-infected replacement group | infected replacement group; 60.9% non-infected replacement group |                                                     |       |       |          |
|-----------------------------|-----------------------------|------------------------|------------------------------------------------------------------------------|------------------------------------------------------------------|-----------------------------------------------------|-------|-------|----------|
| Fricke <sup>15</sup> 2009   | Prospective cohort study    | 44                     | 65.2 (8.2)                                                                   | 13.6%                                                            | Refractory angina                                   | 39.0% | --    | High     |
| Gersbach <sup>16</sup> 1997 | Prospective cohort study    | 20                     | 70                                                                           | 20.0%                                                            | Critical limb ischemia                              | 46.0% | --    | High     |
| Hoelzer <sup>17</sup> 2017  | Retrospective cohort study  | 2737                   | 55.7 (14.5)                                                                  | 59.8%                                                            | 46% FBSS; 27% CRPS; 1% PHN; 27% other               | 30.2% | --    | Low      |
| Horsch <sup>18</sup> 2004   | Retrospective cohort study  | 258                    | 67.0 (9.8)                                                                   | 30.6%                                                            | Critical limb ischemia                              | 58.1% | --    | Moderate |
| Khan <sup>19</sup> 2018     | Retrospective cohort study  | 86                     | 53.0                                                                         | 64.0%                                                            | 37% FBSS; 18% CRPS; 49% neuropathic                 | 43.7% | --    | Moderate |
| Kin <sup>20</sup> 2018      | Retrospective cohort study  | 90                     | 63.5                                                                         | 51.1%                                                            | 48% CLBP; 10% FBSS; 21% post-stroke pain; 21% other | 16.7% | --    | Moderate |
| Klomp <sup>21</sup> 1999    | Randomized controlled trial | Total=120; 60 with SCS | 72.6                                                                         | 41.7%                                                            | Critical limb ischemia                              | 30.0% | 36.7% | Low      |
| Lalkhen <sup>22</sup> 2017  | Cross-sectional study       | 25                     | 50.0                                                                         | NA                                                               | FBSS                                                | 20.0% | --    | High     |
| Madineni <sup>23</sup> 2018 | Retrospective cohort study  | 47                     | 51.7                                                                         | 61.7%                                                            | 98% FBSS                                            | 27.7% | --    | High     |
| Mekhail <sup>2</sup> 2018   | Retrospective cohort study  | 213                    | 53.9                                                                         | 37.5%                                                            | Spine-related pain                                  | 29%   | 34.7% | Moderate |
| Ubbink <sup>24</sup> 1999   | Randomized controlled trial | Total=111; 56 with SCS | 73.0                                                                         | 41.4%                                                            | Critical limb ischemia                              | 44%   | --    | Moderate |

Abbreviations: SCS, spinal cord stimulation; FBSS, failed back surgery syndrome; CRPS, complex regional pain syndrome; PHN, postherpetic neuralgia; CLBP, chronic low back pain; SD, standard deviation.
